# Supplementary material for: Item usage in a multidimensional computerized adaptive test (MCAT) measuring health-related quality of life
Source: Springer Nature journal article supplement (doi:10.1007/s11136-017-1624-3), 2017-06-23
Supplement: MOESM1 [file 12465280]

## Supplement 1 Patient characteristics

|                                                                               | N = 795      |
|-------------------------------------------------------------------------------|--------------|
| <b>Age</b>                                                                    |              |
| Mean (SD)                                                                     | 67.2 (10.08) |
| Missings (%)                                                                  | 6.0          |
| <b>Gender (%)</b>                                                             |              |
| Male                                                                          | 52.7         |
| Female                                                                        | 45.7         |
| Missings                                                                      | 1.6          |
| <b>Marital status (%)</b>                                                     |              |
| Not married/not cohabiting                                                    | 9.2          |
| Not married/cohabiting                                                        | 5.3          |
| Married                                                                       | 60.4         |
| Widow/widower                                                                 | 13.6         |
| Divorced                                                                      | 9.2          |
| Missings                                                                      | 2.4          |
| <b>Highest educational attainment (%)</b>                                     |              |
| Primary school                                                                | 15.2         |
| Prevocational education                                                       | 32.3         |
| Preparatory secondary vocational education/junior general secondary education | 17.5         |
| Secondary vocational education                                                | 13.7         |
| Senior general secondary school/pre-university education                      | 5.2          |
| Higher professional education                                                 | 10.7         |
| University education                                                          | 3.1          |
| Missings                                                                      | 2.3          |
| <b>Current situation (%)</b>                                                  |              |
| Full-time employment                                                          | 8.4          |
| Part-time employment                                                          | 6.5          |
| Homemaker                                                                     | 9.6          |
| Unemployed                                                                    | 3.3          |
| Disabled                                                                      | 13.7         |

|                                             |      |
|---------------------------------------------|------|
| Retired                                     | 56.4 |
| Missings                                    | 2.1  |
| <b>Children (%)</b>                         |      |
| No                                          | 15.0 |
| Only children living away<br>from home      | 72.2 |
| One or more children living<br>at home      | 10.8 |
| Missings                                    | 2.0  |
| <b>Mother tongue (%)</b>                    |      |
| Dutch                                       | 97.0 |
| Moroccan/Turkish/Arabic                     | .6   |
| German/French/English                       | .9   |
| Other                                       | .4   |
| Missings                                    | 1.1  |
| <b>Sports (frequency) (%)</b>               |      |
| I do not participate in sports<br>(anymore) | 45.2 |
| A few times a month                         | 1.8  |
| 1-2 times a week                            | 30.2 |
| Appr. 2-3 times a week                      | 16.7 |
| More than 3 times a week                    | 4.2  |
| Missings                                    | 2.0  |
| <b>Cigarettes (per day) (%)</b>             |      |
| None                                        | 75.3 |
| Less than 5 cigarettes                      | 5.5  |
| 5-10 cigarettes                             | 7.0  |
| 11-20 cigarettes                            | 7.2  |
| 21-30 cigarettes                            | 2.5  |
| 31- 40 cigarettes                           | .3   |
| More than 40 cigarettes                     | .1   |
| Missings                                    | 2.0  |

---

This online supplement accompanies the following paper: *Item usage in a multidimensional computerized adaptive test measuring health-related quality of life* written by Muirne C. S. Paap, Karel Kroeze, Caroline B. Terwee, Job van der Palen, and Bernard P. Veldkamp.

Contact details: Muirne Paap, [m.c.s.paap@cemo.uio.no](mailto:m.c.s.paap@cemo.uio.no)
