# Supplementary material for: Item usage in a multidimensional computerized adaptive test (MCAT) measuring health-related quality of life
Source: Springer Nature journal article supplement (doi:10.1007/s11136-017-1624-3), 2017-06-23
Supplement: MOESM2 [file 12465280]

**Supplement 2** Item parameters for the multidimensional graded response model

| <b>Item code</b> | <b>a</b> | <b>SE(a)</b> | <b>b1</b> | <b>SE(b1)</b> | <b>b2</b> | <b>SE(b2)</b> | <b>b3</b> | <b>SE(b3)</b> | <b>b4</b> | <b>SE(b4)</b> |
|------------------|----------|--------------|-----------|---------------|-----------|---------------|-----------|---------------|-----------|---------------|
| <i>Fatigue</i>   |          |              |           |               |           |               |           |               |           |               |
| AN1              | 2.71     | 0.17         | -2.74     | 0.19          | -0.12     | 0.13          | 2.20      | 0.17          |           |               |
| AN2              | 2.81     | 0.25         | -5.21     | 0.45          | -2.16     | 0.25          | 0.78      | 0.20          | 3.72      | 0.34          |
| AN5              | 1.04     | 0.14         | -1.51     | 0.17          | 0.07      | 0.14          | 1.72      | 0.18          |           |               |
| AN7              | 0.88     | 0.13         | -1.86     | 0.18          | -0.49     | 0.13          | 1.13      | 0.15          | 3.11      | 0.27          |
| AN8              | 1.14     | 0.10         | -3.47     | 0.23          | -1.35     | 0.12          | -0.08     | 0.10          | 1.53      | 0.12          |
| AN12             | 2.09     | 0.23         | -4.81     | 0.45          | -1.86     | 0.21          | -0.31     | 0.16          |           |               |
| AN14             | 1.94     | 0.19         | -2.74     | 0.24          | -0.94     | 0.17          | 0.66      | 0.16          |           |               |
| AN15             | 2.64     | 0.16         | -3.96     | 0.24          | -1.02     | 0.14          | 0.82      | 0.13          | 3.34      | 0.21          |
| AN16             | 2.93     | 0.27         | -5.86     | 0.51          | -2.73     | 0.27          | -0.30     | 0.18          | 1.92      | 0.23          |
| FATEXP2          | 2.30     | 0.21         | -4.51     | 0.39          | -0.53     | 0.18          | 2.44      | 0.25          | 4.38      | 0.37          |
| FATEXP6          | 2.04     | 0.14         | -4.82     | 0.32          | -1.35     | 0.13          | 0.79      | 0.12          | 3.30      | 0.20          |
| FATEXP7          | 2.31     | 0.19         | -4.54     | 0.36          | -1.21     | 0.18          | 1.01      | 0.18          | 3.03      | 0.25          |
| FATEXP18         | 2.64     | 0.22         | -4.73     | 0.39          | 0.02      | 0.17          | 3.58      | 0.31          | 6.09      | 0.51          |
| FATEXP20         | 1.97     | 0.18         | -3.01     | 0.27          | 0.37      | 0.17          | 3.29      | 0.28          | 5.31      | 0.45          |
| FATEXP22         | 2.80     | 0.23         | -3.82     | 0.32          | 0.36      | 0.18          | 4.06      | 0.34          | 6.54      | 0.55          |
| FATEXP24         | 1.61     | 0.17         | -2.23     | 0.22          | 0.38      | 0.16          | 3.36      | 0.30          |           |               |
| FATEXP26         | 2.66     | 0.24         | -2.76     | 0.28          | 0.51      | 0.19          | 2.47      | 0.25          |           |               |
| FATEXP28         | 1.96     | 0.19         | -1.93     | 0.21          | 0.43      | 0.17          | 2.67      | 0.25          |           |               |
| FATEXP38         | 2.46     | 0.20         | -2.49     | 0.23          | 0.68      | 0.18          | 2.46      | 0.23          | 4.99      | 0.39          |
| FATEXP45         | 2.71     | 0.24         | -2.38     | 0.25          | 0.26      | 0.19          | 3.73      | 0.32          |           |               |
| FATEXP46         | 2.09     | 0.19         | -2.29     | 0.21          | -1.11     | 0.17          | 0.56      | 0.16          | 1.11      | 0.17          |
| FATEXP49         | 2.37     | 0.21         | -4.48     | 0.39          | -1.00     | 0.19          | 1.24      | 0.19          | 3.64      | 0.31          |
| FATEXP54         | 1.63     | 0.17         | -2.12     | 0.22          | 0.82      | 0.17          | 4.14      | 0.36          |           |               |
| FATEXP56         | 3.17     | 0.30         | -2.54     | 0.29          | 2.07      | 0.27          | 5.38      | 0.50          |           |               |
| FATIMP1          | 3.61     | 0.29         | -6.40     | 0.56          | -1.72     | 0.25          | 1.23      | 0.23          | 4.24      | 0.36          |
| FATIMP2          | 1.76     | 0.16         | -4.12     | 0.36          | -1.84     | 0.19          | -0.06     | 0.15          | 1.23      | 0.17          |
| FATIMP4          | 3.32     | 0.22         | -5.63     | 0.35          | -1.70     | 0.17          | 1.39      | 0.17          | 4.58      | 0.29          |
| FATIMP5          | 3.30     | 0.27         | -5.22     | 0.43          | -0.96     | 0.21          | 3.00      | 0.30          | 5.47      | 0.45          |
| FATIMP8          | 1.51     | 0.18         | -2.87     | 0.26          | -1.20     | 0.17          | 0.35      | 0.16          |           |               |
| FATIMP9          | 3.60     | 0.30         | -5.02     | 0.44          | -1.52     | 0.25          | 1.72      | 0.25          | 4.22      | 0.37          |
| FATIMP10         | 3.24     | 0.27         | -5.70     | 0.49          | -1.53     | 0.23          | 2.09      | 0.25          | 4.95      | 0.43          |
| FATIMP11         | 1.60     | 0.16         | -2.42     | 0.22          | -0.23     | 0.14          | 1.20      | 0.16          |           |               |
| FATIMP13         | 2.82     | 0.22         | -4.46     | 0.35          | -1.91     | 0.22          | 0.71      | 0.18          | 3.15      | 0.28          |
| FATIMP15         | 2.82     | 0.23         | -4.04     | 0.35          | -0.44     | 0.19          | 2.29      | 0.25          | 4.88      | 0.39          |
| FATIMP16         | 3.31     | 0.29         | -5.82     | 0.48          | -1.95     | 0.23          | 1.63      | 0.23          | 4.26      | 0.38          |
| FATIMP19         | 3.01     | 0.20         | -5.02     | 0.31          | -0.91     | 0.15          | 1.77      | 0.17          | 4.68      | 0.29          |
| FATIMP21         | 2.69     | 0.23         | -5.37     | 0.47          | -2.89     | 0.28          | -0.27     | 0.19          | 2.16      | 0.23          |

|          |      |      |       |      |       |      |       |      |      |      |
|----------|------|------|-------|------|-------|------|-------|------|------|------|
| FATIMP22 | 2.47 | 0.25 | -2.10 | 0.24 | 0.02  | 0.18 | 3.08  | 0.30 |      |      |
| FATIMP25 | 2.27 | 0.19 | -2.72 | 0.24 | -0.19 | 0.16 | 1.97  | 0.21 |      |      |
| FATIMP26 | 3.09 | 0.24 | -5.55 | 0.44 | -2.37 | 0.24 | 0.30  | 0.18 | 3.14 | 0.28 |
| FATIMP29 | 3.77 | 0.25 | -7.57 | 0.54 | -3.56 | 0.27 | 0.61  | 0.16 | 3.82 | 0.26 |
| FATIMP38 | 2.16 | 0.19 | -4.85 | 0.42 | -2.61 | 0.24 | -0.73 | 0.16 | 0.80 | 0.17 |
| FATIMP40 | 0.82 | 0.12 | -2.46 | 0.21 | -0.64 | 0.13 | 1.28  | 0.15 |      |      |
| FATIMP42 | 3.25 | 0.26 | -5.87 | 0.49 | -1.51 | 0.22 | 2.62  | 0.27 | 5.06 | 0.41 |
| FATIMP47 | 2.93 | 0.18 | -5.83 | 0.37 | -2.27 | 0.18 | -0.24 | 0.14 | 2.10 | 0.17 |
| FATIMP49 | 3.24 | 0.20 | -5.41 | 0.33 | -1.58 | 0.16 | 0.90  | 0.15 | 4.03 | 0.25 |
| FATIMP52 | 2.26 | 0.22 | -2.73 | 0.26 | -0.85 | 0.18 | 1.56  | 0.20 |      |      |
| FATIMP53 | 2.55 | 0.15 | -4.00 | 0.24 | -1.08 | 0.14 | 1.18  | 0.14 | 3.46 | 0.21 |
| HI12     | 1.80 | 0.18 | -2.81 | 0.26 | -0.84 | 0.17 | 0.80  | 0.17 |      |      |
| HI7      | 2.54 | 0.21 | -3.28 | 0.28 | -0.98 | 0.18 | 1.34  | 0.19 | 4.66 | 0.37 |

*Physical Function*

|         |      |      |       |      |       |      |       |      |      |      |
|---------|------|------|-------|------|-------|------|-------|------|------|------|
| PFA1    | 1.91 | 0.17 | -0.17 | 0.15 | 2.63  | 0.24 | 4.78  | 0.39 |      |      |
| PFA3    | 1.83 | 0.12 | -3.38 | 0.20 | -0.06 | 0.11 | 1.87  | 0.14 | 3.28 | 0.19 |
| PFA4    | 2.96 | 0.27 | -0.67 | 0.20 | 2.53  | 0.28 | 4.67  | 0.40 |      |      |
| PFA5    | 2.42 | 0.19 | -2.59 | 0.23 | 0.32  | 0.17 | 2.65  | 0.24 | 4.67 | 0.35 |
| PFA6    | 2.85 | 0.27 | -2.43 | 0.25 | -0.26 | 0.18 | 1.41  | 0.21 |      |      |
| PFA10   | 2.28 | 0.21 | -1.06 | 0.18 | 0.03  | 0.16 | 1.34  | 0.19 | 3.22 | 0.28 |
| PFA11   | 3.34 | 0.19 | -2.46 | 0.17 | 0.01  | 0.14 | 1.80  | 0.17 | 4.40 | 0.26 |
| PFA13   | 1.82 | 0.16 | -0.32 | 0.15 | 0.90  | 0.16 | 2.27  | 0.21 | 4.76 | 0.38 |
| PFA15   | 2.16 | 0.22 | -3.16 | 0.28 | -1.66 | 0.20 | -0.22 | 0.16 |      |      |
| PFA17   | 2.47 | 0.22 | -3.36 | 0.29 | -1.15 | 0.19 | 0.10  | 0.18 | 1.51 | 0.20 |
| PFA19R1 | 2.80 | 0.39 | 4.38  | 0.56 | 6.59  | 0.77 |       |      |      |      |
| PFA21   | 2.85 | 0.17 | -1.38 | 0.14 | 0.87  | 0.14 | 2.68  | 0.18 | 5.30 | 0.31 |
| PFA23   | 2.82 | 0.16 | -2.60 | 0.17 | -0.72 | 0.13 | 0.56  | 0.13 | 2.66 | 0.18 |
| PFA25   | 3.65 | 0.30 | -1.56 | 0.23 | 0.79  | 0.21 | 3.62  | 0.35 | 6.60 | 0.57 |
| PFA31R1 | 1.99 | 0.18 | -2.62 | 0.24 | -1.01 | 0.18 | 0.20  | 0.16 | 2.26 | 0.22 |
| PFA33   | 1.53 | 0.15 | 0.54  | 0.15 | 2.02  | 0.20 | 3.45  | 0.28 |      |      |
| PFA37   | 2.04 | 0.21 | -3.08 | 0.28 | -1.48 | 0.19 | 0.23  | 0.16 |      |      |
| PFA39R1 | 1.78 | 0.30 | 2.93  | 0.36 | 4.26  | 0.47 |       |      |      |      |
| PFA41   | 1.90 | 0.16 | -2.31 | 0.20 | -0.39 | 0.15 | 1.11  | 0.17 | 2.70 | 0.23 |
| PFA42   | 2.90 | 0.23 | -1.16 | 0.19 | 0.50  | 0.18 | 1.95  | 0.22 | 4.31 | 0.35 |
| PFA45   | 1.84 | 0.25 | -2.61 | 0.26 | -0.92 | 0.18 |       |      |      |      |
| PFA47   | 2.82 | 0.27 | -4.21 | 0.36 | -2.12 | 0.23 | -0.08 | 0.18 |      |      |
| PFA52   | 1.88 | 0.20 | -3.71 | 0.33 | -1.90 | 0.20 | -1.06 | 0.17 | 0.53 | 0.16 |
| PFA53   | 3.13 | 0.27 | -5.09 | 0.43 | -3.03 | 0.29 | -1.01 | 0.21 | 1.69 | 0.23 |
| PFA55   | 2.94 | 0.27 | -3.05 | 0.28 | -1.47 | 0.21 | 0.36  | 0.18 |      |      |
| PFA56   | 2.07 | 0.20 | -3.94 | 0.34 | -2.02 | 0.21 | 0.31  | 0.16 |      |      |
| PFB1    | 4.75 | 0.41 | -4.13 | 0.41 | 0.20  | 0.24 | 3.45  | 0.38 | 6.80 | 0.61 |
| PFB3    | 3.08 | 0.26 | -3.34 | 0.30 | -0.63 | 0.19 | 1.43  | 0.22 | 3.30 | 0.30 |

|         |      |      |       |      |       |      |       |      |      |      |
|---------|------|------|-------|------|-------|------|-------|------|------|------|
| PFB5R1  | 2.74 | 0.24 | -0.25 | 0.18 | 2.32  | 0.25 | 4.73  | 0.40 |      |      |
| PFB7    | 2.90 | 0.26 | 0.13  | 0.19 | 2.92  | 0.30 | 5.07  | 0.45 |      |      |
| PFB8R1  | 3.21 | 0.20 | -0.39 | 0.13 | 1.29  | 0.15 | 2.87  | 0.21 | 5.23 | 0.32 |
| PFB10   | 2.98 | 0.26 | -4.74 | 0.41 | -2.28 | 0.25 | -0.82 | 0.20 | 0.99 | 0.20 |
| PFB11   | 2.86 | 0.29 | -3.24 | 0.30 | -1.96 | 0.24 | -0.13 | 0.19 |      |      |
| PFB12   | 2.93 | 0.23 | -2.86 | 0.25 | -0.67 | 0.18 | 0.68  | 0.18 | 3.28 | 0.29 |
| PFB13   | 2.98 | 0.26 | -3.91 | 0.34 | -2.13 | 0.24 | -0.27 | 0.19 | 1.60 | 0.23 |
| PFB17   | 1.98 | 0.19 | -2.55 | 0.23 | -1.17 | 0.17 | 0.58  | 0.16 |      |      |
| PFB24   | 2.51 | 0.22 | 0.00  | 0.17 | 2.05  | 0.23 | 3.61  | 0.32 | 5.23 | 0.44 |
| PFB26   | 3.12 | 0.38 | -4.16 | 0.43 | -2.54 | 0.30 | -1.02 | 0.23 |      |      |
| PFB28R1 | 1.52 | 0.15 | -1.06 | 0.15 | 0.00  | 0.14 | 0.77  | 0.15 | 2.09 | 0.20 |
| PFB32   | 1.76 | 0.17 | -2.86 | 0.24 | -1.85 | 0.19 | -0.73 | 0.16 | 0.76 | 0.16 |
| PFB36   | 2.88 | 0.22 | -4.42 | 0.29 | -2.65 | 0.20 | -1.02 | 0.15 |      |      |
| PFB39R1 | 1.85 | 0.18 | -2.40 | 0.22 | -0.78 | 0.16 | 0.02  | 0.15 | 1.65 | 0.19 |
| PFB42   | 1.82 | 0.16 | -1.05 | 0.16 | -0.02 | 0.15 | 1.01  | 0.17 | 2.38 | 0.21 |
| PFB43   | 2.56 | 0.16 | -5.73 | 0.38 | -2.42 | 0.17 | -0.02 | 0.12 | 1.70 | 0.15 |
| PFB44   | 4.58 | 0.43 | -2.79 | 0.31 | 1.46  | 0.29 | 4.55  | 0.50 | 7.67 | 0.76 |
| PFB48   | 2.56 | 0.21 | -5.23 | 0.44 | -2.52 | 0.23 | -0.25 | 0.17 | 1.40 | 0.19 |
| PFB49   | 2.71 | 0.21 | -3.34 | 0.28 | -1.14 | 0.19 | 0.99  | 0.19 | 2.83 | 0.26 |
| PFB50   | 2.82 | 0.22 | -5.53 | 0.47 | -1.26 | 0.20 | 1.60  | 0.21 | 4.81 | 0.39 |
| PFB54   | 2.75 | 0.16 | -6.28 | 0.43 | -2.60 | 0.17 | -0.27 | 0.13 | 1.98 | 0.16 |
| PFB56R1 | 1.67 | 0.18 | -2.75 | 0.24 | -1.38 | 0.17 | -0.51 | 0.15 | 0.81 | 0.16 |
| PFC6R1  | 2.63 | 0.23 | -3.79 | 0.31 | -1.96 | 0.22 | -0.79 | 0.18 | 0.99 | 0.18 |
| PFC7R1  | 1.86 | 0.36 | 4.42  | 0.61 |       |      |       |      |      |      |
| PFC10   | 2.47 | 0.21 | -1.70 | 0.20 | 1.39  | 0.20 | 3.76  | 0.31 |      |      |
| PFC12   | 3.40 | 0.29 | -0.95 | 0.21 | 1.80  | 0.24 | 3.93  | 0.36 | 6.53 | 0.56 |
| PFC13R1 | 2.39 | 0.26 | 2.40  | 0.29 | 4.03  | 0.39 | 5.30  | 0.49 |      |      |
| PFC29   | 1.70 | 0.18 | -2.61 | 0.24 | -1.91 | 0.20 | -1.09 | 0.17 | 0.60 | 0.16 |
| PFC32   | 1.31 | 0.14 | 0.40  | 0.15 | 1.75  | 0.19 | 2.68  | 0.23 | 4.05 | 0.34 |
| PFC35   | 3.14 | 0.32 | 1.58  | 0.25 | 4.15  | 0.44 | 5.90  | 0.58 |      |      |
| PFC36R1 | 2.65 | 0.21 | -1.61 | 0.20 | 0.64  | 0.18 | 2.76  | 0.26 | 4.64 | 0.36 |
| PFC37   | 2.25 | 0.18 | -3.11 | 0.25 | -0.37 | 0.16 | 1.74  | 0.20 | 3.37 | 0.27 |
| PFC38   | 2.61 | 0.15 | -2.65 | 0.17 | -1.06 | 0.13 | 0.35  | 0.12 | 2.47 | 0.17 |
| PFC41   | 1.47 | 0.14 | -3.79 | 0.33 | -1.57 | 0.17 | -0.37 | 0.14 | 1.40 | 0.17 |
| PFC56   | 2.65 | 0.18 | -4.13 | 0.25 | -1.71 | 0.15 | 0.79  | 0.13 |      |      |

*Social roles\**

|          |      |      |       |      |       |      |      |      |      |      |
|----------|------|------|-------|------|-------|------|------|------|------|------|
| RP1      | 3.35 | 0.20 | -3.94 | 0.24 | -0.72 | 0.14 | 2.76 | 0.20 | 5.40 | 0.33 |
| RP6      | 2.88 | 0.24 | -2.28 | 0.25 | 1.06  | 0.19 | 3.74 | 0.32 |      |      |
| SRPPER_C | 3.19 | 0.26 | -5.78 | 0.50 | -2.16 | 0.24 | 0.74 | 0.19 | 3.58 | 0.31 |
| SRPPER01 | 2.74 | 0.23 | -5.03 | 0.43 | -1.48 | 0.21 | 1.17 | 0.21 | 3.13 | 0.29 |
| SRPPER02 | 3.13 | 0.18 | -3.45 | 0.22 | -0.26 | 0.13 | 2.79 | 0.20 | 5.05 | 0.30 |
| SRPPER03 | 3.50 | 0.20 | -4.60 | 0.28 | -1.10 | 0.15 | 1.95 | 0.17 | 4.60 | 0.28 |

|          |      |      |       |      |       |      |       |      |      |      |
|----------|------|------|-------|------|-------|------|-------|------|------|------|
| SRPPER04 | 2.71 | 0.16 | -2.94 | 0.19 | 0.00  | 0.13 | 2.89  | 0.20 | 5.19 | 0.30 |
| SRPPER05 | 3.90 | 0.32 | -5.43 | 0.46 | -1.16 | 0.23 | 2.17  | 0.28 | 4.79 | 0.43 |
| SRPPER06 | 3.76 | 0.32 | -4.75 | 0.42 | -1.18 | 0.23 | 2.67  | 0.29 | 5.27 | 0.46 |
| SRPPER07 | 3.97 | 0.33 | -5.57 | 0.47 | -1.33 | 0.24 | 2.13  | 0.28 | 4.93 | 0.44 |
| SRPPER08 | 3.98 | 0.33 | -6.82 | 0.59 | -2.60 | 0.29 | 1.22  | 0.22 | 4.86 | 0.42 |
| SRPPER09 | 4.02 | 0.34 | -4.53 | 0.41 | -0.09 | 0.23 | 3.18  | 0.35 | 5.77 | 0.52 |
| SRPPER11 | 4.18 | 0.36 | -5.84 | 0.52 | -1.27 | 0.24 | 2.26  | 0.28 | 6.33 | 0.57 |
| SRPPER13 | 3.06 | 0.25 | -4.09 | 0.35 | -0.83 | 0.20 | 1.75  | 0.23 | 4.52 | 0.38 |
| SRPPER14 | 4.44 | 0.26 | -6.96 | 0.43 | -2.42 | 0.21 | 1.46  | 0.18 | 5.03 | 0.32 |
| SRPPER15 | 4.45 | 0.26 | -6.93 | 0.43 | -2.13 | 0.20 | 2.03  | 0.20 | 5.74 | 0.36 |
| SRPPER16 | 2.62 | 0.22 | -2.27 | 0.24 | 0.62  | 0.18 | 3.41  | 0.30 | 5.42 | 0.46 |
| SRPPER17 | 3.11 | 0.26 | -5.57 | 0.48 | -2.00 | 0.24 | 0.56  | 0.20 | 2.91 | 0.29 |
| SRPPER18 | 4.53 | 0.27 | -6.67 | 0.41 | -1.68 | 0.19 | 2.23  | 0.20 | 5.89 | 0.37 |
| SRPPER20 | 5.40 | 0.46 | -6.92 | 0.64 | -2.15 | 0.30 | 2.96  | 0.33 | 7.18 | 0.65 |
| SRPPER21 | 3.78 | 0.31 | -4.97 | 0.44 | -0.94 | 0.22 | 3.09  | 0.31 | 6.25 | 0.54 |
| SRPPER22 | 3.11 | 0.26 | -2.32 | 0.25 | 0.60  | 0.19 | 3.71  | 0.33 |      |      |
| SRPPER23 | 4.68 | 0.40 | -5.09 | 0.46 | -0.11 | 0.24 | 3.49  | 0.38 | 6.83 | 0.62 |
| SRPPER26 | 3.86 | 0.33 | -5.38 | 0.49 | -1.28 | 0.23 | 2.56  | 0.29 | 5.83 | 0.51 |
| SRPPER28 | 4.77 | 0.41 | -6.72 | 0.59 | -1.62 | 0.27 | 2.71  | 0.34 | 6.33 | 0.57 |
| SRPPER31 | 2.40 | 0.21 | -2.80 | 0.26 | -0.14 | 0.17 | 2.46  | 0.24 |      |      |
| SRPPER35 | 3.18 | 0.26 | -4.73 | 0.41 | -1.61 | 0.22 | 1.81  | 0.23 | 4.66 | 0.39 |
| SRPPER36 | 3.45 | 0.28 | -4.94 | 0.43 | -1.34 | 0.22 | 1.85  | 0.24 | 4.81 | 0.41 |
| SRPPER37 | 3.97 | 0.33 | -4.34 | 0.39 | -0.26 | 0.22 | 3.17  | 0.34 | 5.95 | 0.52 |
| SRPPER42 | 3.94 | 0.23 | -6.97 | 0.44 | -2.14 | 0.19 | 1.20  | 0.16 | 3.99 | 0.26 |
| SRPPER43 | 1.98 | 0.13 | -5.19 | 0.37 | -2.29 | 0.16 | -0.46 | 0.12 | 1.32 | 0.13 |
| SRPPER46 | 3.41 | 0.20 | -5.24 | 0.32 | -1.21 | 0.15 | 1.85  | 0.17 | 4.87 | 0.29 |
| SRPPER47 | 2.98 | 0.24 | -4.10 | 0.36 | -1.59 | 0.22 | 1.06  | 0.20 | 3.69 | 0.32 |
| SRPPER54 | 3.08 | 0.25 | -4.23 | 0.35 | -1.43 | 0.21 | 1.59  | 0.23 | 3.97 | 0.35 |
| SRPPER55 | 2.55 | 0.21 | -4.92 | 0.43 | -1.87 | 0.22 | 0.16  | 0.17 | 2.80 | 0.26 |

*COPD-SIB*

|           |      |      |       |      |       |      |       |      |      |      |
|-----------|------|------|-------|------|-------|------|-------|------|------|------|
| QRIQ_E1R1 | 1.06 | 0.15 | -2.73 | 0.27 | -0.97 | 0.16 | 0.61  | 0.16 |      |      |
| QRIQ_E2   | 1.10 | 0.08 | -3.37 | 0.19 | -0.74 | 0.09 | 0.66  | 0.09 | 2.06 | 0.12 |
| QRIQ_E3   | 1.23 | 0.14 | -2.54 | 0.24 | 0.04  | 0.15 | 1.34  | 0.17 | 2.79 | 0.25 |
| QRIQ_E4   | 1.29 | 0.14 | -2.82 | 0.27 | -0.07 | 0.15 | 1.38  | 0.18 | 2.61 | 0.24 |
| CSIB1     | 1.15 | 0.10 | -2.37 | 0.16 | -0.22 | 0.10 | 1.07  | 0.12 | 2.57 | 0.17 |
| VQ11_6R1  | 1.73 | 0.10 | -1.35 | 0.10 | 1.98  | 0.12 | 2.95  | 0.15 | 4.71 | 0.24 |
| CSIB2     | 1.55 | 0.16 | -3.91 | 0.37 | -1.20 | 0.17 | 0.48  | 0.15 | 2.59 | 0.23 |
| CSIB3     | 1.08 | 0.08 | -2.40 | 0.13 | 0.22  | 0.08 | 1.36  | 0.09 | 3.55 | 0.18 |
| CSIB4     | 1.39 | 0.15 | -1.32 | 0.17 | 1.33  | 0.17 | 2.41  | 0.21 | 3.75 | 0.32 |
| CSIB5     | 1.06 | 0.12 | -3.13 | 0.27 | -1.66 | 0.17 | -0.14 | 0.13 | 1.71 | 0.17 |
| CSIB6     | 1.32 | 0.16 | -2.48 | 0.23 | -0.13 | 0.15 | 1.28  | 0.17 | 3.77 | 0.35 |
| CSIB7     | 1.58 | 0.17 | -2.38 | 0.23 | -0.46 | 0.16 | 1.62  | 0.19 |      |      |

|           |      |      |       |      |       |      |       |      |      |      |
|-----------|------|------|-------|------|-------|------|-------|------|------|------|
| CSIB8     | 1.04 | 0.14 | -0.95 | 0.15 | 0.15  | 0.14 | 2.25  | 0.21 |      |      |
| CSIB9     | 2.14 | 0.19 | -1.62 | 0.19 | 1.74  | 0.20 | 3.23  | 0.28 | 5.17 | 0.43 |
| CSIB10    | 1.32 | 0.16 | -2.90 | 0.27 | 0.48  | 0.15 | 1.44  | 0.18 | 3.56 | 0.32 |
| CSIB11    | 1.78 | 0.10 | -3.67 | 0.19 | -1.18 | 0.10 | 0.23  | 0.09 | 2.57 | 0.13 |
| CSIB12    | 1.51 | 0.15 | -1.94 | 0.20 | 1.10  | 0.17 | 2.28  | 0.21 | 4.19 | 0.36 |
| QRIQ_C8R1 | 2.01 | 0.20 | -4.04 | 0.37 | -0.43 | 0.17 | 0.54  | 0.17 | 3.02 | 0.28 |
| MRF11R1   | 1.54 | 0.15 | -3.48 | 0.29 | -0.65 | 0.15 | 0.38  | 0.14 | 2.64 | 0.23 |
| MRF18R1   | 1.80 | 0.10 | -3.54 | 0.18 | -1.00 | 0.09 | 0.14  | 0.09 | 2.30 | 0.13 |
| MRF19R1   | 1.42 | 0.14 | -3.01 | 0.25 | -0.79 | 0.15 | 0.29  | 0.14 | 2.27 | 0.20 |
| MRF20R1   | 1.63 | 0.19 | -2.00 | 0.21 | -0.62 | 0.16 | 2.01  | 0.21 |      |      |
| CSIB13    | 2.22 | 0.18 | -3.88 | 0.31 | -0.94 | 0.17 | 1.80  | 0.20 | 3.60 | 0.29 |
| CSIB14    | 1.64 | 0.20 | -3.83 | 0.37 | -1.98 | 0.22 | -0.77 | 0.17 |      |      |
| CSIB15    | 1.34 | 0.16 | -2.55 | 0.22 | -0.88 | 0.15 | 0.44  | 0.14 |      |      |
| CSIB16    | 1.75 | 0.20 | -3.38 | 0.31 | -1.21 | 0.18 | 0.80  | 0.17 |      |      |
| CSIB17    | 1.03 | 0.13 | -2.95 | 0.25 | -0.81 | 0.14 | 1.34  | 0.16 |      |      |
| CSIB18    | 1.16 | 0.14 | -3.62 | 0.35 | -1.17 | 0.16 | 1.25  | 0.17 |      |      |
| SGRQ3R1   | 1.70 | 0.16 | -2.59 | 0.25 | 0.08  | 0.16 | 3.25  | 0.29 | 4.91 | 0.44 |
| SGRQ12    | 2.20 | 0.20 | -2.73 | 0.24 | -0.81 | 0.17 | 0.87  | 0.17 | 2.25 | 0.22 |
| SGRQ13    | 2.38 | 0.20 | -4.54 | 0.37 | -2.40 | 0.23 | 0.27  | 0.17 | 2.01 | 0.21 |
| SGRQ18    | 1.20 | 0.14 | -2.01 | 0.20 | -0.40 | 0.14 | 1.53  | 0.17 |      |      |
| SGRQ19    | 1.60 | 0.16 | -2.72 | 0.26 | 0.38  | 0.15 | 1.41  | 0.18 | 2.98 | 0.26 |
| SGRQ20R1  | 1.47 | 0.16 | -3.70 | 0.35 | -0.53 | 0.15 | 0.73  | 0.16 | 2.98 | 0.27 |
| SGRQ21R1  | 1.39 | 0.15 | -2.32 | 0.21 | 0.58  | 0.15 | 1.55  | 0.17 | 3.44 | 0.29 |
| SGRQ22    | 1.26 | 0.08 | -3.30 | 0.17 | -0.72 | 0.08 | 0.44  | 0.08 | 2.55 | 0.13 |
| SGRQ23R1  | 1.93 | 0.19 | -1.80 | 0.20 | 2.55  | 0.25 | 3.66  | 0.31 |      |      |
| SGRQ24R1  | 1.04 | 0.08 | -3.26 | 0.17 | -1.08 | 0.09 | 0.06  | 0.08 | 2.40 | 0.12 |
| SGRQ25R1  | 1.72 | 0.18 | -4.01 | 0.38 | -1.24 | 0.17 | 0.15  | 0.15 | 2.83 | 0.26 |
| SGRQ26    | 2.22 | 0.20 | -3.75 | 0.33 | -1.03 | 0.18 | 0.56  | 0.17 | 3.42 | 0.31 |
| SGRQ27R1  | 1.42 | 0.15 | -1.87 | 0.19 | -0.30 | 0.15 | 2.79  | 0.25 |      |      |
| SGRQ29R1  | 2.16 | 0.21 | -3.66 | 0.33 | -0.11 | 0.17 | 1.17  | 0.19 | 3.32 | 0.30 |
| SGRQ31    | 1.98 | 0.17 | -3.61 | 0.29 | -0.62 | 0.16 | 1.00  | 0.17 | 4.03 | 0.33 |
| SGRQ42R1a | 2.59 | 0.25 | -2.23 | 0.24 | 0.98  | 0.19 | 2.24  | 0.24 | 4.95 | 0.44 |
| SGRQ42R1b | 2.40 | 0.23 | -1.49 | 0.20 | 1.47  | 0.21 | 2.57  | 0.26 | 4.90 | 0.45 |
| SGRQ43R1  | 1.50 | 0.16 | -0.70 | 0.15 | 1.98  | 0.20 | 2.89  | 0.25 | 4.51 | 0.40 |

\* Ability to participate in social roles and activities

Note that all items in the model were assigned to (loaded on) one domain each. Thus, the a's printed here equal the estimated discrimination parameters for the domain in question while the other three parameters were constrained to 0. In this table, we collapsed the four original discrimination parameter estimate columns to improve readability.

This online supplement accompanies the following paper: *Item usage in a multidimensional computerized adaptive test measuring health-related quality of life* written by Muirne C. S. Paap, Karel Kroeze, Caroline B. Terwee, Job van der Palen, and Bernard P. Veldkamp.

If you want to use the COBD-SIB items and map the item parameters reported here to the item numbers (and item content) printed in the paper “The COPD-SIB: a newly developed disease-specific item bank to measure health-related quality of life in patients with chronic obstructive pulmonary disease”, please contact the first author.

Contact details: Muirne Paap, [m.c.s.paap@cemo.uio.no](mailto:m.c.s.paap@cemo.uio.no)
