# Supplementary material for: Item usage in a multidimensional computerized adaptive test (MCAT) measuring health-related quality of life
Source: Springer Nature journal article supplement (doi:10.1007/s11136-017-1624-3), 2017-06-23
Supplement: MOESM3 [file 12465280]

### Supplement 3 Accuracy and precision of latent trait estimation

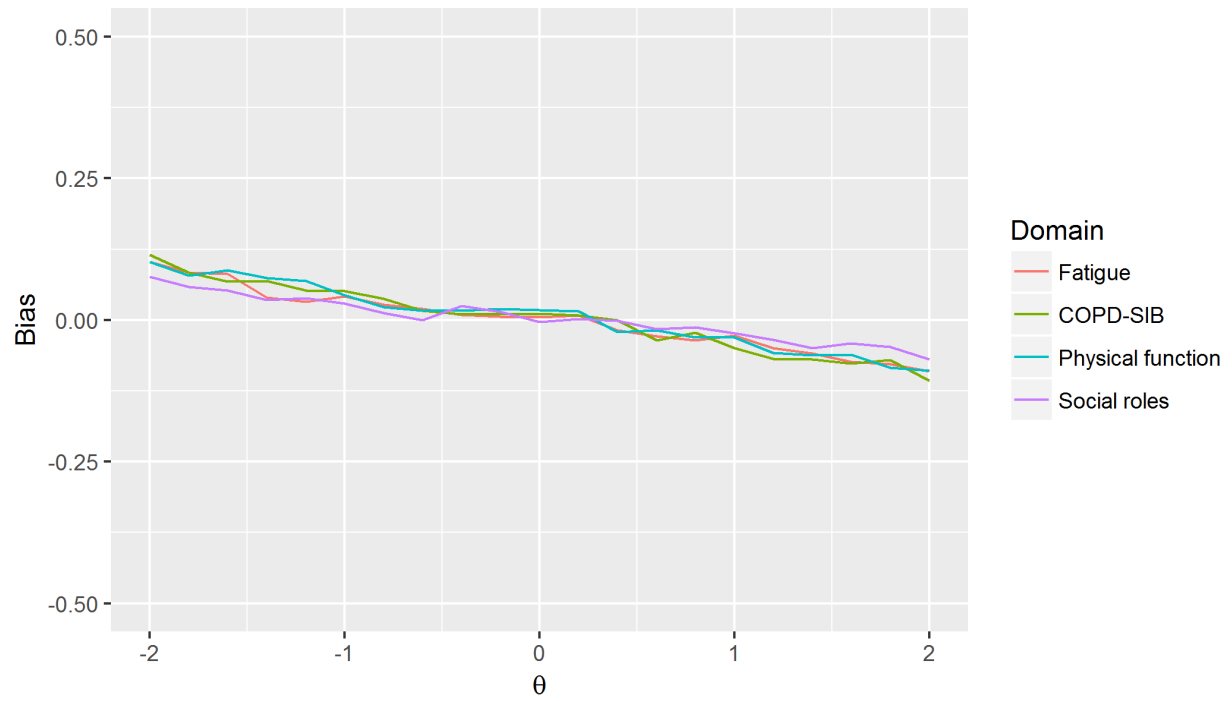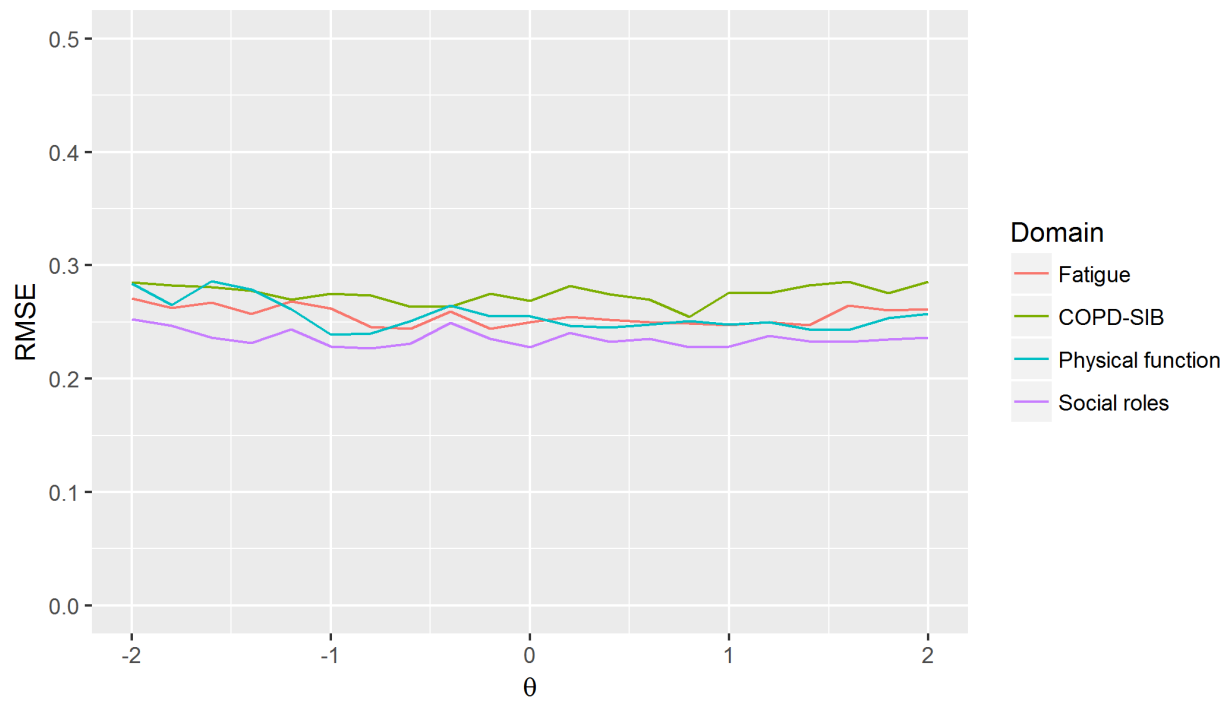

This online supplement accompanies the following paper: *Item usage in a multidimensional computerized adaptive test measuring health-related quality of life* written by Muirne C. S. Paap, Karel Kroeze, Caroline B. Terwee, Job van der Palen, and Bernard P. Veldkamp.

Contact details: Muirne Paap, [m.c.s.paap@cemo.uio.no](mailto:m.c.s.paap@cemo.uio.no)
